# Supplementary material
Source: PubMed Central journal article supplement (PMC9231288)

**Supplementary Table 1. Detailed dietary information per patient**

| Patient | Group | Metagenome | Day full feed 72hrs | Day first MOM | Day last MOM | Day first formula | Day last formula | Day first fortifier | Day last fortifier |
|---------|-------|------------|---------------------|---------------|--------------|-------------------|------------------|---------------------|--------------------|
| 367     | CTRL  | YES        | 24                  | 2             | 18           | 9                 | 78               | -                   | -                  |
| 369     | CTRL  | YES        | 11                  | 2             | 97           | 76                | 97               | 26                  | 82                 |
| 379     | CTRL  | YES        | 14                  | 1             | 70           | 33                | 108              | 21                  | 70                 |
| 381     | CTRL  | YES        | 14                  | 1             | 103          | 52                | 116              | 21                  | 103                |
| 394     | CTRL  | YES        | 13                  | 2             | 144          | -                 | -                | 17                  | 144                |
| 403     | CTRL  | YES        | 12                  | 1             | 67           | -                 | -                | 17                  | 64                 |
| 405     | CTRL  | YES        | 12                  | 1             | 67           | -                 | -                | 17                  | 64                 |
| 407     | CTRL  | NO         | 14                  | 0             | 54           | -                 | -                | 34                  | Discharged         |
| 420     | CTRL  | YES        | 20                  | 2             | 40           | 29                | 59               | -                   | -                  |
| 422     | CTRL  | YES        | 31                  | 2             | 33           | 39                | 116              | -                   | -                  |
| 423     | CTRL  | YES        | 15                  | 2             | 36           | 38                | 116              | -                   | -                  |
| 431     | CTRL  | YES        | 12                  | 2             | 116          | -                 | -                | 19                  | 116                |
| 440     | CTRL  | YES        | 13                  | 1             | 86           | 17                | 25               | 26                  | 87                 |
| 447     | CTRL  | YES        | 22                  | 2             | 114          | -                 | -                | 26                  | 114                |
| 450     | CTRL  | YES        | 15                  | 6             | 64           | 64                | 111              | -                   | -                  |
| 457     | CTRL  | YES        | 13                  | 5             | 48           | -                 | -                | 20                  | 50                 |
| 463     | CTRL  | YES        | 15                  | 4             | 50           | 31                | 122              | 14                  | 50                 |
| 465     | CTRL  | YES        | 13                  | 2             | Discharged   | -                 | -                | 14                  | 94                 |
| 473     | CTRL  | YES        | 13                  | 2             | 54           | 30                | 54               | 22                  | 26                 |
| 478     | CTRL  | YES        | 12                  | 2             | 38           | 25                | 84               | -                   | -                  |
| 479     | CTRL  | YES        | 15                  | 3             | 70           | 52                | 70               | 20                  | 70                 |
| 509     | CTRL  | YES        | 15                  | 3             | 22           | -                 | -                | -                   | -                  |
| 512     | CTRL  | YES        | 10                  | 2             | 31           | -                 | -                | 23                  | 31                 |
| 520     | CTRL  | YES        | 23                  | 4             | 58           | 25                | 106              | 32                  | 58                 |
| 534     | CTRL  | YES        | 21                  | 3             | 82           | 79                | 100              | 30                  | 98                 |
| 535     | CTRL  | YES        | 13                  | 3             | 45           | -                 | -                | 40                  | 45                 |
| 547     | CTRL  | YES        | 17                  | 3             | Died         | -                 | -                | -                   | -                  |
| 552     | CTRL  | YES        | 20                  | 3             | 91           | 81                | 106              | 41                  | 81                 |
| 554     | CTRL  | YES        | 12                  | 4             | 41           | 15                | 113              | -                   | -                  |
| 559     | CTRL  | YES        | 12                  | 2             | 93           | 94                | 160              | 12                  | 71                 |
| 575     | CTRL  | YES        | 24                  | 4             | 21           | 18                | 99               | -                   | -                  |
| 593     | CTRL  | YES        | 12                  | 2             | 47           | 10                | Discharged       | -                   | -                  |
| 594     | CTRL  | YES        | 17                  | 3             | 29           | 18                | 121              | -                   | -                  |
| 610     | CTRL  | YES        | 17                  | 4             | 64           | 65                | 96               | 18                  | 64                 |
| 652     | CTRL  | NO         | 17                  | 4             | 28           | 27                | 99               | -                   | -                  |
| 676     | CTRL  | NO         | 34                  | 1             | 34           | -                 | -                | -                   | -                  |
| 682     | CTRL  | YES        | 17                  | 4             | 67           | 57                | 67               | 27                  | 67                 |
| 364     | NEC   | YES        | 11                  | 2             | 83           | -                 | -                | 56                  | 83                 |
| 373     | NEC   | NO         | 11                  | 2             | 44           | -                 | -                | -                   | -                  |
| 376     | NEC   | NO         | 44                  | 4             | 96           | -                 | -                | 65                  | 96                 |
| 377     | NEC   | NO         | 18                  | 1             | 53           | 54                | 96               | 26                  | 29                 |
| 384     | NEC   | NO         | 12                  | 1             | 36           | 32                | 46               | 35                  | 36                 |
| 385     | NEC   | NO         | 30                  | 4             | Transferred  | 75                | Transferred      | 70                  | Transferred        |
| 388     | NEC   | NO         | 15                  | 2             | 36           | 18                | 115              | -                   | -                  |
| 392     | NEC   | NO         | 49                  | 7             | Discharged   | -                 | -                | 76                  | 105                |
| 393     | NEC   | YES        | 28                  | 3             | 69           | 54                | 145              | -                   | -                  |
| 395     | NEC   | YES        | 41                  | 2             | 69           | 27                | 154              | -                   | -                  |
| 396     | NEC   | NO         | 34                  | 2             | 68           | 42                | 68               | 48                  | 67                 |
| 408     | NEC   | YES        | 18                  | 3             | 28           | 24                | 120              | -                   | -                  |
| 410     | NEC   | YES        | 50                  | 1             | 82           | 76                | 139              | -                   | -                  |
| 415     | NEC   | YES        | 25                  | 3             | 33           | 34                | 93               | -                   | -                  |
| 424     | NEC   | YES        | 12                  | 3             | 114          | -                 | -                | 41                  | n/a                |
| 443     | NEC   | NO         | 15                  | 3             | 32           | 33                | 156              | -                   | -                  |
| 445     | NEC   | NO         | 9                   | 1             | 68           | 61                | Discharged       | 43                  | 72                 |
| 451     | NEC   | YES        | 13                  | 2             | 86           | 87                | 119              | 20                  | 85                 |
| 461     | NEC   | NO         | 20                  | 4             | Transferred  | -                 | -                | -                   | -                  |
| 474     | NEC   | NO         | 13                  | 2             | Died         | -                 | -                | -                   | -                  |
| 506     | NEC   | YES        | 11                  | 2             | 86           | 82                | 104              | 65                  | 86                 |
| 529     | NEC   | NO         | Never               | 3             | -            | -                 | -                | -                   | -                  |
| 580     | NEC   | YES        | 13                  | 4             | 17           | 18                | 88               | 17                  | 17                 |
| 592     | NEC   | NO         | Never               | 4             | 40           | -                 | -                | -                   | -                  |
| 596     | NEC   | YES        | 114                 | 4             | 14           | 26                | 132              | -                   | -                  |
| 629     | NEC   | YES        | 23                  | 2             | 41           | 39                | 106              | -                   | -                  |
| 636     | NEC   | YES        | 12                  | 2             | 58           | -                 | -                | -                   | -                  |
| 639     | NEC   | NO         | 27                  | 5             | 96           | 85                | 115              | -                   | -                  |
| 690     | NEC   | NO         | 11                  | 2             | 102          | -                 | -                | 62                  | 77                 |
| 691     | NEC   | NO         | 13                  | 3             | 108          | -                 | -                | 34                  | 52                 |
| 692     | NEC   | NO         | 26                  | 3             | 140          | -                 | -                | 35                  | 46                 |
| 712     | NEC   | YES        | 20                  | 3             | 126          | 88                | 126              | -                   | -                  |
| 723     | NEC   | NO         | 30                  | 2             | 34           | 35                | 83               | -                   | -                  |

Supplementary Table 2. Detailed antibiotic information per patient

| Patient | Group | Metagenome | Antibiotic courses                                                                                                   | How to interpret                                                                                                                                                               |
|---------|-------|------------|----------------------------------------------------------------------------------------------------------------------|--------------------------------------------------------------------------------------------------------------------------------------------------------------------------------|
| 367     | CTRL  | YES        | 0 (P2, G2); 25 (A2, G2, F8)                                                                                          | e.g., day 0 infant received 2 days of Benzyl-penicillin and 2 days of Gentamicin; day 25 infant received 2 days of Amoxicillin, 2 days of Gentamicin, 8 days of Flucloxacillin |
| 369     | CTRL  | YES        | 0 (P2, G2); 3 (mero5)                                                                                                |                                                                                                                                                                                |
| 379     | CTRL  | YES        | 0 (P2, G2); 26 (A12); 29 (G4, F4); 87 (A1, F1, G1)                                                                   |                                                                                                                                                                                |
| 381     | CTRL  | YES        | 0 (P2, G2); 4 (A2, F2, G2); 14 (G3, A3, F3); 26 (A7); 86 (A3, F3, G3)                                                |                                                                                                                                                                                |
| 394     | CTRL  | YES        | 0 (P2, G2); 3 (V5, C5); 18 (A5, F5, G5); 41 (C5); 51 (F3, A6, G5); 65 (V2, C2)                                       |                                                                                                                                                                                |
| 403     | CTRL  | YES        | 0 (P2, G2)                                                                                                           |                                                                                                                                                                                |
| 405     | CTRL  | YES        | 0 (P2, G2); 47 (F2, A2, G2)                                                                                          |                                                                                                                                                                                |
| 407     | CTRL  | NO         | 0 (p2, G2); 9 (A3, F3, G3); 20 (C3, V3, M3)                                                                          |                                                                                                                                                                                |
| 420     | CTRL  | YES        | 0 (P2, G2); 6 (C2, V2, M2); 12 (C2, V3); 15 (F12)                                                                    |                                                                                                                                                                                |
| 422     | CTRL  | YES        | 0 (P2, G2); 8 (V2, C2); 32 (V6, C6)                                                                                  |                                                                                                                                                                                |
| 423     | CTRL  | YES        | 0 (P2, G2); 7 (V5, C5); 15 (A2, F2, G2)                                                                              |                                                                                                                                                                                |
| 431     | CTRL  | YES        | 0 (P2, G2); 11 (A2, G2, F2); 18 (C10); 22 (G5); 27 (Tazo7); 65 (A5, G5, F5)                                          |                                                                                                                                                                                |
| 440     | CTRL  | YES        | 0 (P2, G2); 6 (F4)                                                                                                   |                                                                                                                                                                                |
| 447     | CTRL  | YES        | 0 (A5, G5, M5); 11 (C4, V4); 26 (C5); 33 (C5, V5); 43 (C4, V4)                                                       |                                                                                                                                                                                |
| 450     | CTRL  | YES        | 0 (P2, G2); 9 (V5, C5); 37 (A2, G2, F2)                                                                              |                                                                                                                                                                                |
| 457     | CTRL  | YES        | 0 (P5, G5); 7 (V2, C2)                                                                                               |                                                                                                                                                                                |
| 463     | CTRL  | YES        | 0 (P2, G2); 14 (a3, G3, F3); 38 (A2, F2, G2); 61 (F5, A1, G5)                                                        |                                                                                                                                                                                |
| 465     | CTRL  | YES        | 0 (P2, G2); 10 (C6, V6); 22 (A5, F3, G3); 26 (V2)                                                                    |                                                                                                                                                                                |
| 473     | CTRL  | YES        | 0 (P2, G2); 16 (A2, F2, G2)                                                                                          |                                                                                                                                                                                |
| 478     | CTRL  | YES        | 0 (P2, G2); 10 (F7); 66 (F7, A4)                                                                                     |                                                                                                                                                                                |
| 479     | CTRL  | YES        | 0 (P2, G2); 3 (V2, C2); 54 (A2, F2, G2)                                                                              |                                                                                                                                                                                |
| 509     | CTRL  | YES        | 0 (P2, G2); 11 (A2, M2, G2)                                                                                          |                                                                                                                                                                                |
| 512     | CTRL  | YES        | 0 (P2, G2); 21 (A2, F2, G2)                                                                                          |                                                                                                                                                                                |
| 520     | CTRL  | YES        | 0 (P5, G5); 16 (A2, F2, G2); 21 (V2, C2); 37 (taz5)                                                                  |                                                                                                                                                                                |
| 534     | CTRL  | YES        | 0 (P2, G2); 11 (V3, C3); 14 (A11)                                                                                    |                                                                                                                                                                                |
| 535     | CTRL  | YES        | 0 (P2, G2); 2 (V4, C4); 21 (V3, C3, M3); 36 (A2, F2); 41 (A2, F2)                                                    |                                                                                                                                                                                |
| 547     | CTRL  | YES        | 0 (P2, G2); 8 (V7, C7); 14 (F5, G5, V5, C5); 30 (F5); 56 (azith10, mero10)                                           |                                                                                                                                                                                |
| 552     | CTRL  | YES        | 0 (A5, G5, M5); 5 (V5, C5); 12 (F2, A2, G2)                                                                          |                                                                                                                                                                                |
| 554     | CTRL  | YES        | 0 (P5, G5); 6 (C5, V5); 19 (A2, G2, F2); 22 (V2, C2); 30 (A2, F2, G2); 33 (V5, C5); 44 (A7, F7, G7)                  |                                                                                                                                                                                |
| 559     | CTRL  | YES        | 0 (P2, G2); 20 (F7); 27 (co-tri5); 32 (mero 5); 39 (V5, C5, M5)                                                      |                                                                                                                                                                                |
| 575     | CTRL  | YES        | 0 (P2, G2); 3 (F1); 6 (V5, C5); 15 (V2, C2)                                                                          |                                                                                                                                                                                |
| 593     | CTRL  | YES        | 0 (P2, G2)                                                                                                           |                                                                                                                                                                                |
| 594     | CTRL  | YES        | 0 (P2, G2); 6 (C5, V5); 27 (A13, F2); 37 (C5, V2)                                                                    |                                                                                                                                                                                |
| 610     | CTRL  | YES        | 0 (P2, G2); 14 (V2, C2)                                                                                              |                                                                                                                                                                                |
| 652     | CTRL  | NO         | 0 (P5, G5); 14 (V7, C2); 30 (A2, F2)                                                                                 |                                                                                                                                                                                |
| 676     | CTRL  | NO         | 0 (P2, G2); 4 (C7, V8); 13 (F3, A3, G3); 16 (V7, C7, M7); 31 (V3, C3, M3)                                            |                                                                                                                                                                                |
| 682     | CTRL  | YES        | 0 (P2, G2); 3 (V2, C2)                                                                                               |                                                                                                                                                                                |
| 364     | NEC   | YES        | 0 (P2, G2); 9 (C4, V6); 38 (V9, C9); 40 (M6); 61 (V2, M2, C2)                                                        |                                                                                                                                                                                |
| 373     | NEC   | NO         | 0 (P2, G2); 28 (V7, C7, M7)                                                                                          |                                                                                                                                                                                |
| 376     | NEC   | NO         | 0 (P2, G2); 2 (C3, V3); 8 (V7, C7, M7); 17 (V5, M5, C5); 44 (A3, G3, F3); 63 (A3, F10, G3); 98 (V3, C3, M3)          |                                                                                                                                                                                |
| 377     | NEC   | NO         | 34 (C7, M7, V7); 51 (A2, F2, G2); 81 (V5, C2); 87 (M6, C6)                                                           |                                                                                                                                                                                |
| 384     | NEC   | NO         | 10 (F5); 14 (C5, V5); 14 (A8, G8, M8); 23 (V2, C2)                                                                   |                                                                                                                                                                                |
| 385     | NEC   | NO         | 0 (P3, G3); 9 (V10, C10, M10); 82 (A2, F2, G2)                                                                       |                                                                                                                                                                                |
| 388     | NEC   | NO         | 0 (P2, G2); 5 (C3, V3); 31 (A6, F6, G6, M6); 57 (A3, F3, G3)                                                         |                                                                                                                                                                                |
| 392     | NEC   | NO         | No data before this. 24 (C9, M9); 25 (V7); 74 (A5, F5, G5)                                                           |                                                                                                                                                                                |
| 393     | NEC   | YES        | 0 (P2, G2); 14 (C5, V5, M5); 53 (A2, F2, G2)                                                                         |                                                                                                                                                                                |
| 395     | NEC   | YES        | 0 (P2, G2); 6 (V5, C5, M5); 19 (mero5); 54 (A2, F2)                                                                  |                                                                                                                                                                                |
| 396     | NEC   | NO         | 0 (A2, F2, G2); 16 (V10, C10, M10)                                                                                   |                                                                                                                                                                                |
| 408     | NEC   | YES        | 0 (P2, G2); 11 (V7); 28 (V7, C7, M7)                                                                                 |                                                                                                                                                                                |
| 410     | NEC   | YES        | 0 (P2, G2); 7 (V17, C3); 14 (M5, C1); 15 (t4); 18 (Mero7); 25 (Ambi6, G6, Clotri8); 37 (V13); 40 (Clotri5)           |                                                                                                                                                                                |
| 415     | NEC   | YES        | 0 (P2, G2); 5 (A7, G7, F7); 7 (M5); 17 (V2, C2)                                                                      |                                                                                                                                                                                |
| 424     | NEC   | YES        | 0 (P2, G2); 13 (A7, F7, G5, M7); 19 (Cef5); 27 (V2, C2, M2); 54 (A2, F2, G2); 76 (G1, C3); 83 (Cef); 97 (A4, F4, G4) |                                                                                                                                                                                |
| 443     | NEC   | NO         | 0 (P2, G2); 5 (V5, C2); 19 (V8, C8, M8); 37 (A21); 67 (A2, G2, F2)                                                   |                                                                                                                                                                                |
| 445     | NEC   | NO         | 0 (P2, G2); 5 (V2, C2); 15 (V8, C8, M8)                                                                              |                                                                                                                                                                                |
| 451     | NEC   | YES        | 0 (P1, G1); 1 (v5); 12 (A2, F2); 14 (co-amox5); 21 (co-tri 5); 38 (Cef8, M8, co-tri8)                                |                                                                                                                                                                                |
| 461     | NEC   | NO         | 0 (P2, G2); 13 (A2, F2, G2, M8); 14 (V3, C7); 17 (F7)                                                                |                                                                                                                                                                                |
| 474     | NEC   | NO         | 0 (P2, G2); 14 (A2, F2, G2); 19 (V7, C7, M7)                                                                         |                                                                                                                                                                                |
| 506     | NEC   | YES        | 0 (P2, G2); 8 (Taz5); 30 (V2, Mero7); 52 (Mero5, V5); 61 (V2)                                                        |                                                                                                                                                                                |
| 529     | NEC   | NO         | 0 (P2, G2); 4 (V5, C5); 18 (VCM 19); 47 (VCM2); 52 (F5); 57 (VCM5); 92 (co-amox2)                                    |                                                                                                                                                                                |
| 580     | NEC   | YES        | 0 (P2, G2); 24 (A5, F5, G5); 60 (a7, F7, G7, M7)                                                                     |                                                                                                                                                                                |
| 592     | NEC   | NO         | 5 (V5, C5); 13 (co-amox7); 18 (taz7M7); 27 (F5, G5); 68 (mero10)                                                     |                                                                                                                                                                                |
| 596     | NEC   | YES        | 0 (P2, G2); 5 (V7, C2); 12 (V12, C12, M12); 31 (co-tri); 34 (mero26); 74 (F5)                                        |                                                                                                                                                                                |
| 629     | NEC   | YES        | 0 (P2, G2); 7 (V7, C7); 10 (M5); 36 (F5)                                                                             |                                                                                                                                                                                |
| 636     | NEC   | YES        | 0 (P5, G5); 12 (C5); 51 (A2, F2); 69 (V5, C5, M5)                                                                    |                                                                                                                                                                                |
| 639     | NEC   | NO         | 0 (P2, G2); 8 (A2, F2, G2); 14 (V1, C1); 15 (A21); 24 (V5, C5, M5)                                                   |                                                                                                                                                                                |
| 690     | NEC   | NO         | 0 (P5, G5); 9 (V14, C14, M14)                                                                                        |                                                                                                                                                                                |
| 691     | NEC   | NO         | 0 (P2, G2); 14 (V7, C7, M7); 42 (A2, F2, G2)                                                                         |                                                                                                                                                                                |
| 692     | NEC   | NO         | 0 (P2, G2); 5 (V2, C2); 8 (Mero7, V7); 46 (A7, F7, G7, M7); 58 (cef21); 96 (cef5)                                    |                                                                                                                                                                                |
| 712     | NEC   | YES        | 0 (P2, G2); 11 (C21, V2); 31 (A5, G5, F5); 39 (V7, C7, M5); 56 (V5, C5, M5)                                          |                                                                                                                                                                                |
| 723     | NEC   | NO         | 0 (P3, G3); 5 (F2, G2, M2); 8 (VCM5); 17 (V5, C5, M5)                                                                |                                                                                                                                                                                |

A, Amoxicillin; Ambi, Ambisome; Azith, Azithromycin; C, Ceftazidime; Cef, Cefuroxime; Clotri, Cotrimoxazole; Co-amox, Co-amoxiclavulnic acid; Co-tri, Co-trimoxazole; F, Flucloxacillin; G, Gentamicin; M, Metronidazole; Mero, Meropenem; P, Benzyl-penicillin; Tazo, Tazocin; V, Vancomycin

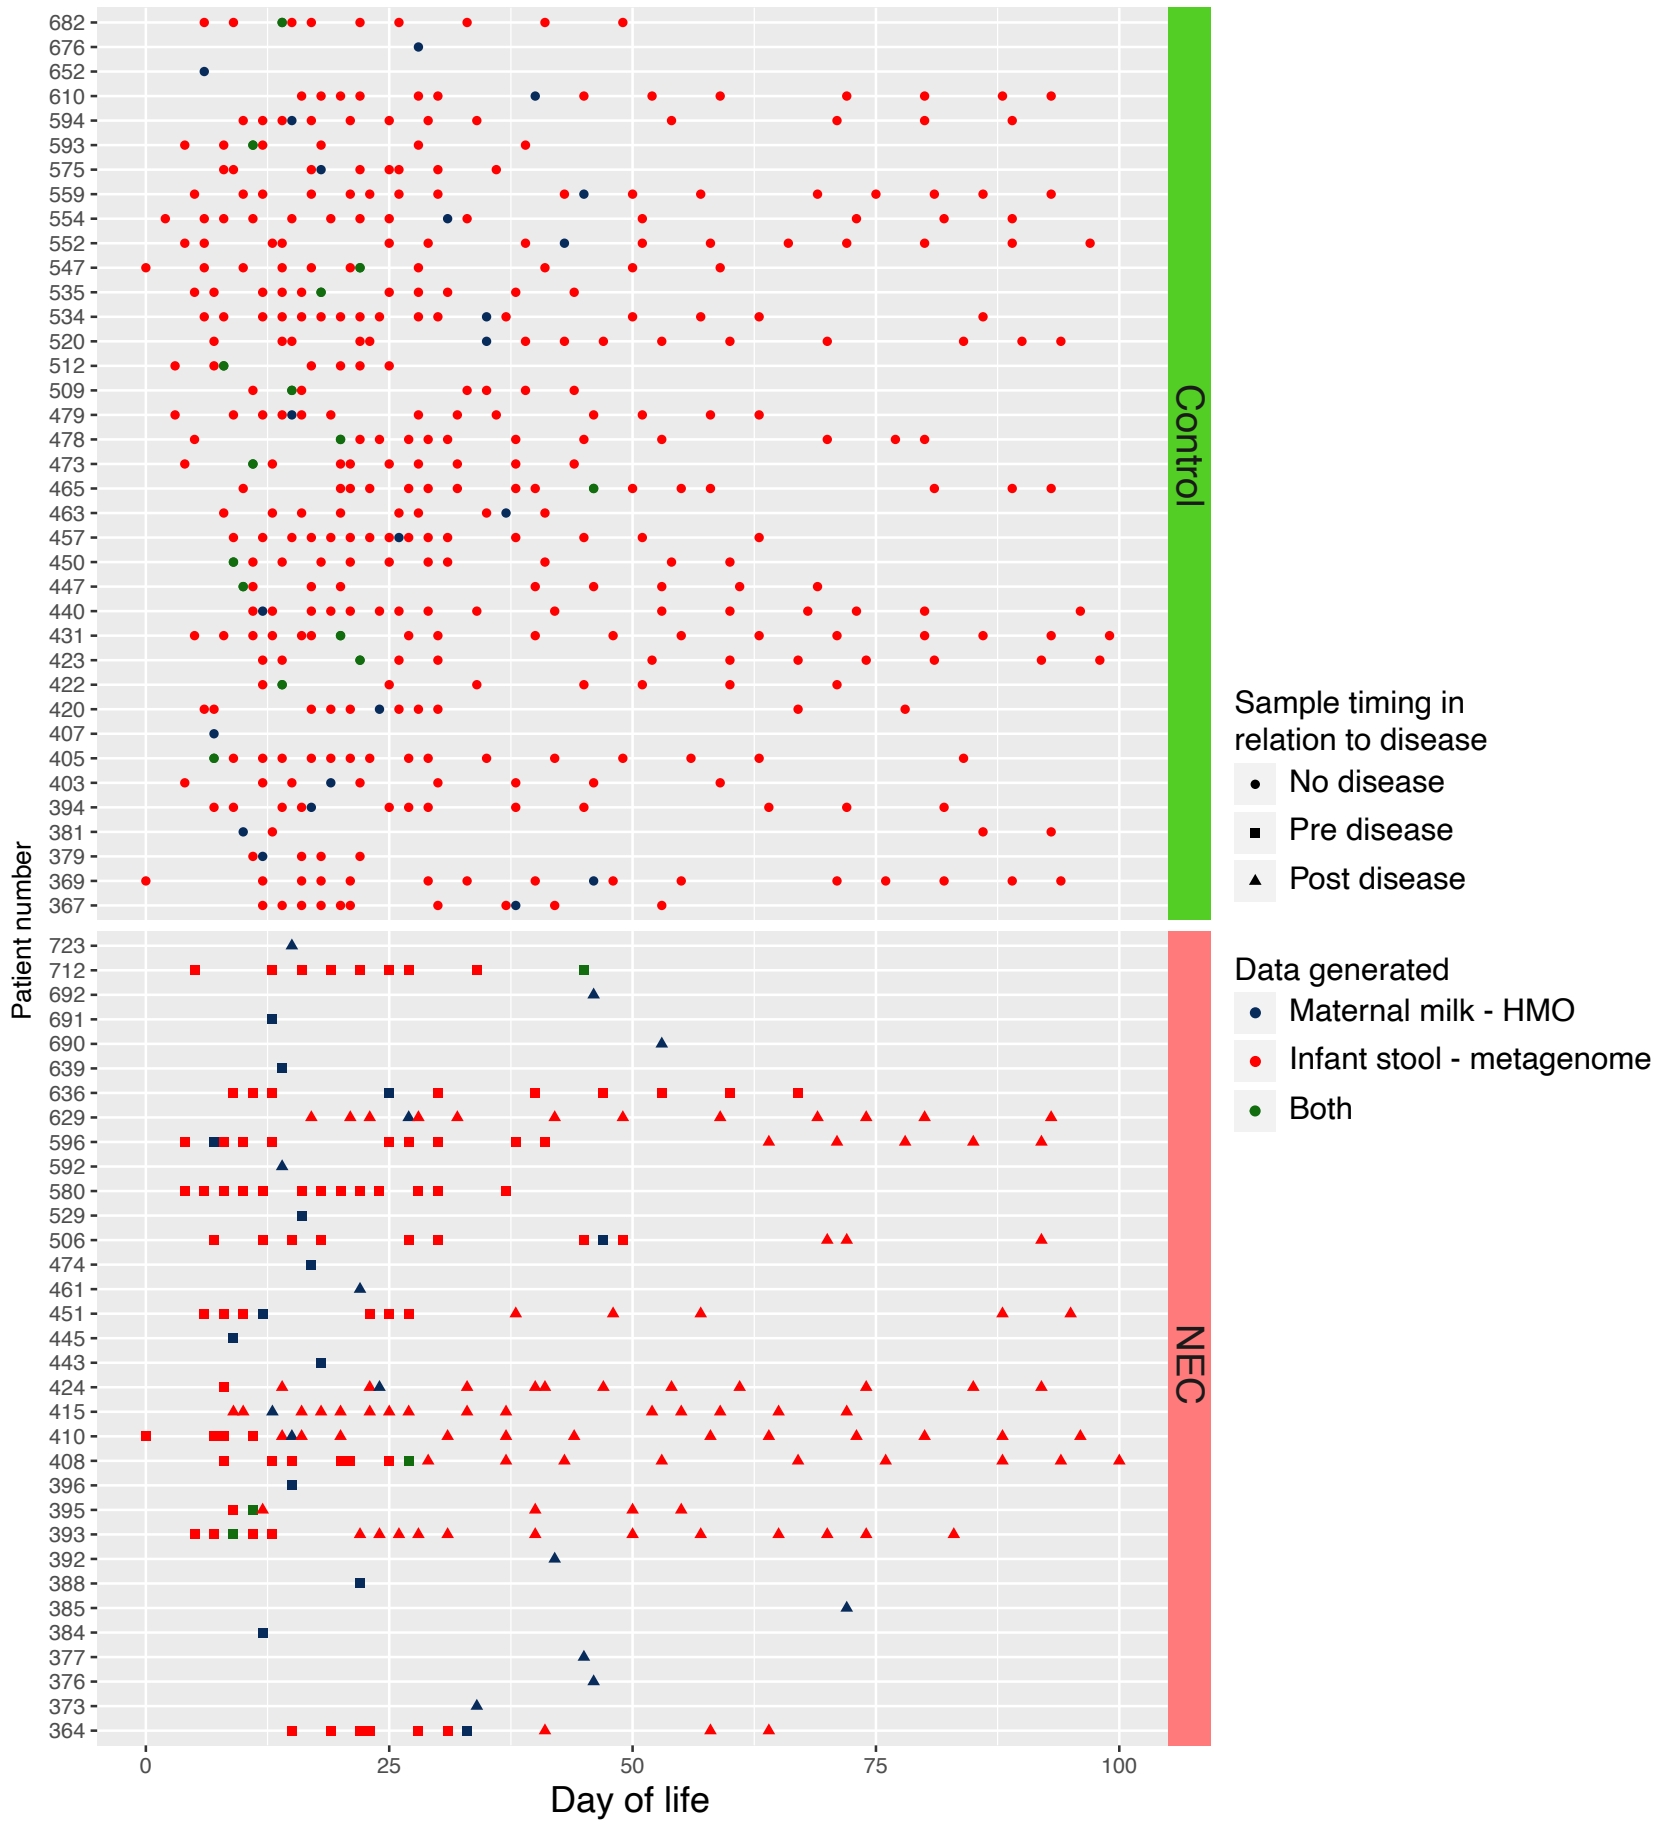

**Online supplementary table 3. Sub-cohort of infants with longitudinal metagenome data from stool samples.**

|                         | <b>Control</b>     | <b>NEC</b>       | <b>P value*</b> |
|-------------------------|--------------------|------------------|-----------------|
| Number of patients      | 34                 | 14               | -               |
| Number of stool samples | 449                | 195              | -               |
| Secretors               | 23 (68%)           | 10 (71%)         | 0.797           |
| Male                    | 12 (35%)           | 11 (79%)         | 0.006           |
| Vaginal delivery        | 24 (71%)           | 7 (50%)          | 0.175           |
| Gestational age         | 25 [24; 26]        | 25 [24; 26.75]   | 0.908           |
| Birthweight             | 645 [586.3; 747.5] | 670 [562.5; 735] | 0.447           |
| Probiotics ever         | 34 (100%)          | 13 (93%)         | 0.871           |
| MOM only                | 2 (6%)             | 1 (7%)           |                 |
| MOM + Formula           | 10 (29%)           | 8 (57%)          |                 |
| MOM + BMF               | 9 (27%)            | 2 (14%)          | 0.315           |
| MOM + Formula + BMF     | 13 (38%)           | 3 (22%)          |                 |
| DOL NEC onset           | -                  | 28 [13; 51]      | -               |
| NEC surgical            | -                  | 4                | -               |

NEC, necrotising enterocolitis; MOM, mother's own breast milk; BMF, breast milk fortifier; DOL, day of life

\*Differences between groups were tested applying Chi-square test and Dunn's post-hoc test where applicable.

## **Human milk oligosaccharide DSLNT and gut microbiome in preterm infants predicts necrotising enterocolitis**

Andrea C Masi, Nicholas D Embleton, Christopher A Lamb, Gregory Young, Claire L Granger, Julia A Najera, Daniel P Smith, Kristi L. Hoffman, Joseph F. Petrosino, Lars Bode, Janet E Berrington, Christopher J Stewart

### **Supplementary methods**

#### *Human milk oligosaccharides analysis*

MOM was collected aseptically after expression and research samples were obtained from the syringe at completion of feed. Thus, the day of the MOM samples reflects the day the infant received the milk and does not necessarily reflect the day milk was expressed. The absolute quantification for the 19 most abundant HMOs was determined by high-performance liquid chromatography (HPLC) following derivatization as per the protocol described by Bode *et al.* (1). Briefly, raffinose was added to every sample before analysis to work as internal standard. Lipids, proteins, lactose, salts and peptides were removed by stepwise solid-phase extraction. HMOs were labelled by adding the fluorescent tag 2-aminobenzamide to the reducing end and subsequently analysed by HPLC on an amide-80 column. The HMOs quantified account for >95% of total HMOs and included: 2'-fucosyllactose (2'FL), 3-fucosyllactose (3FL), lacto-N-neotetraose (LNnT), 3'-sialyllactose (3'SL), difucosyllactose (DFlac), 6'-sialyllactose (6'SL), lacto-N-tetraose (LNT), lacto-N-fucopentaose (LNFP) I, LNFP II, LNFP III, sialyl-LNT (LST) b, LSTc, difucosyl-LNT (DFLNT), lacto-N-hexaose (LNH), disialyllacto-N-tetraose (DSLNT), fucosyl-lacto-N-hexaose (FLNH), difucosyl-lacto-N-hexaose (DFLNH), fucosyl-disialyl-lacto-N-hexaose (FDSLNH) and disialyl-lacto-N-hexaose (DSLNH). Maternal secretor (presence of an active FUT2 gene) status was determined by presence or near-absence of 2'FL in the breast milk analysed.

### *Metagenomes*

Infant stool was obtained directly from the nappy/diaper. DNA was extracted from ~0.1g of stool using the DNeasy PowerSoil Kit (QIAGEN) following the manufacturer's protocol. In addition to stool samples, extraction was performed on a positive (Zymo Microbial Community Standard) and negative (no sample at all) controls. A negative control was extracted in every batch of 24 samples. Library prep was performed using the Nextera DNA Flex Kit. Sequencing was performed on the HiSeq X Ten (Illumina) with a target read depth of 10M reads per sample with a read length of 150bp paired end reads.

Raw fastq files were quality trimmed and Illumina adapters removed using bbdduk (BBMap version 38.69). Trimming parameters included kmer length of 19, allowing one mismatch, and a minimum Phred score of 20. Post-trimming, reads with a minimum average Phred <17 and length <50 bp were discarded. Host contamination reads were identified by mapping trimmed fastq files to a combined database containing the hg38 reference human genome and PhiX (standard Illumina spike in) using bbmap (BBMap version 37.58) with kmer length of 15, bloom filter enabled, and fast search settings. Host reads were subsequently removed, and the remaining processed fastq files were mapped against the MetaPhlan2 marker gene database (mpa\_v20\_m200) using bbmap with the bloom filter enabled and fast search settings (2). Finally, the metaphlan.py script was used to generate kingdom specific taxonomic profiles.

### *Statistical analysis*

Statistical analysis of HMO profiles was performed using MetaboAnalyst 3.0 (3). Orthogonal Partial Least Squares - Discriminant Analysis (OPLS-DA) and Partial Least Squares - Discriminant Analysis (PLS-DA), for 2 or more group comparison respectively, were performed on HMO data normalised by logarithmic transformation and 2000 random permutations were used to test the significance of group separation. HMO Shannon diversity was calculated using "vegan" (version 2.5-6) package (4) in R. Wilcoxon rank-sum test or

Kruskal Wallis test were used for variables comparison between two or more groups, respectively, and P values were adjusted applying the Benjamini & Hochberg correction (5). Variables with >2 groups deemed significant with Kruskal-Wallis underwent Dunn's post-hoc test to determine P values specific to each group comparisons and resulting P values were adjusted applying Bonferroni method (6).

To test potential role of individual HMOs as biomarker for disease development, univariate receiver operating characteristic (ROC) curve analysis was performed, and optimal cut-off was defined by the closest point of the curve to the top-left corner. Multivariate ROC curves were also generated using linear Support Vector Machine (SVM) classification method coupled with Monte-Carlo cross validation (MCCV) to test the classification performance obtained by using 2, 3, 5, 7, 10, or 19 HMOs. In each MCCV step, two thirds of the dataset were used to determine feature importance and classification model performance was evaluated with the remaining third of the samples which was left out.

Correlation between clinical variables and individual HMOs was tested by performing a multivariate adjusted linear model in R (version 3.6.3). HMO concentrations were normalised by log-transformation prior to analysis and P values were adjusted applying the Benjamini & Hochberg correction (5). Clinical variables tested included delivery mode, gestational age at birth, disease status, day of life (DOL), and postmenstrual age (PMA) of sample, maternal secretor status and infant sex.

A total of 10,015,821,590 mapped reads (median 14,426,827 reads per sample) were obtained from metagenomic sequencing of the 644 preterm infant stool samples. The lowest sample contained 152,718 mapped reads. The cross-sectional cohort of stool samples collected from NEC infants before diagnosis and matched controls was analysed using MicrobiomeAnalyst (7, 8). Alpha diversity analysis was performed based on observed species (richness) and Shannon diversity, and beta-diversity was performed using Bray-Curtis principal coordinate

analysis and differences between groups performed using permutational multivariate analysis of variance (PERMANOVA). MetagenomeSeq was used to assess differential abundance at the phyla and species level. This approach utilises both cumulative sum scaling normalization and zero-inflated Gaussian distribution mixture or zero-inflated Log-Normal mixture model. DMM clusters samples on the basis of microbial community structure (9) and was used to determine the preterm gut community types (PGCTs) from all samples, as performed previously (10, 11). The appropriate number of clusters was determined based on the lowest Laplace approximation score (9). Five PGCT was found to be optimal, and these were ordered 1-5 based on the average DOL of samples within that PGCT, where PGCT-1 contained on average the samples collected from the earliest DOL and PGCT-5 contained on average the samples collected from the oldest DOL. Analysis was performed at specific time windows, including only a single sample per infant in each time point. In cases where an infant had more than one sample within a given time window, the chosen sample reflected the PGCT which was most common among an infant's samples within the given time window. The ratios of each PGCT were compared by chi-square test.

The association of various clinical variables on the HMO and metagenome profiles was tested by applying the function "adonis" of "vegan" (version 2.5-6) package (4) in R. Bray-Curtis dissimilarity was used for calculating the dissimilarity matrix, and 10000 permutations were applied. Each test was performed stepwise and P values were adjusted using Benjamini & Hochberg (5). Clinical factors tested were delivery mode, gestational age, birthweight, sex, maternal secretor status, infant antibiotic administration (i.e., receiving antibiotics yes/no at time of sample), infant probiotic administration (i.e., receiving probiotic at time of sample, before, after, or never), diet (i.e., combinations of expressed breast milk and formula), DOL and PMA of sample, and disease status.



Random Forest algorithm was used for comparing the performance of classification models built using cross-sectional HMO profile data (nmol/ml), cross-sectional pre-NEC and matched control metagenomic data (count), and both HMO and metagenome datasets combined. The contribution given by each variable was evaluated through the Mean Decrease Accuracy (MDA) value, which indicates how much the accuracy of the model decreases when that variable is removed. The higher the MDA value, the more important that feature is. Variables associated to a negative MDA value were removed and a new model was built on the subset of variables. This step of feature filtering was performed until the model with best classification performance was obtained.

## References

1. L. Bode *et al.*, Human milk oligosaccharide concentration and risk of postnatal transmission of HIV through breastfeeding. *Am J Clin Nutr* **96**, 831-839 (2012).
2. D. T. Truong *et al.*, MetaPhlAn2 for enhanced metagenomic taxonomic profiling. *Nat Methods* **12**, 902-903 (2015).
3. J. Xia, I. V. Sinelnikov, B. Han, D. S. Wishart, MetaboAnalyst 3.0--making metabolomics more meaningful. *Nucleic Acids Res* **43**, W251-257 (2015).
4. F. G. B. Jari Oksanen, Michael Friendly, Roeland Kindt, Pierre Legendre, Dan McGlenn, Peter R. Minchin, R. B. O'Hara, Gavin L. Simpson, Peter Solymos, M. Henry H. Stevens, Eduard Szoecs, Helene Wagner, vegan: Community Ecology Package. R package version 2.5-6. . <https://CRAN.R-project.org/package=vegan>, (2019).
5. Y. Benjamini, Y. Hochberg, Controlling the False Discovery Rate: A Practical and Powerful Approach to Multiple Testing. *Journal of the Royal Statistical Society: Series B (Methodological)* **57**, 289-300 (1995).
6. O. J. Dunn, Multiple Comparisons Among Means. *Journal of the American Statistical Association* **56**, 52-64 (1961).
7. J. Chong, P. Liu, G. Zhou, J. Xia, Using MicrobiomeAnalyst for comprehensive statistical, functional, and meta-analysis of microbiome data. *Nat Protoc* **15**, 799-821 (2020).
8. A. Dhariwal *et al.*, MicrobiomeAnalyst: a web-based tool for comprehensive statistical, visual and meta-analysis of microbiome data. *Nucleic Acids Res* **45**, W180-W188 (2017).
9. I. Holmes, K. Harris, C. Quince, Dirichlet multinomial mixtures: generative models for microbial metagenomics. *PLoS One* **7**, e30126 (2012).

10. C. J. Stewart *et al.*, Cesarean or Vaginal Birth Does Not Impact the Longitudinal Development of the Gut Microbiome in a Cohort of Exclusively Preterm Infants. *Front Microbiol* **8**, 1008 (2017).
11. C. J. Stewart *et al.*, Temporal development of the gut microbiome in early childhood from the TEDDY study. *Nature* **562**, 583-588 (2018).

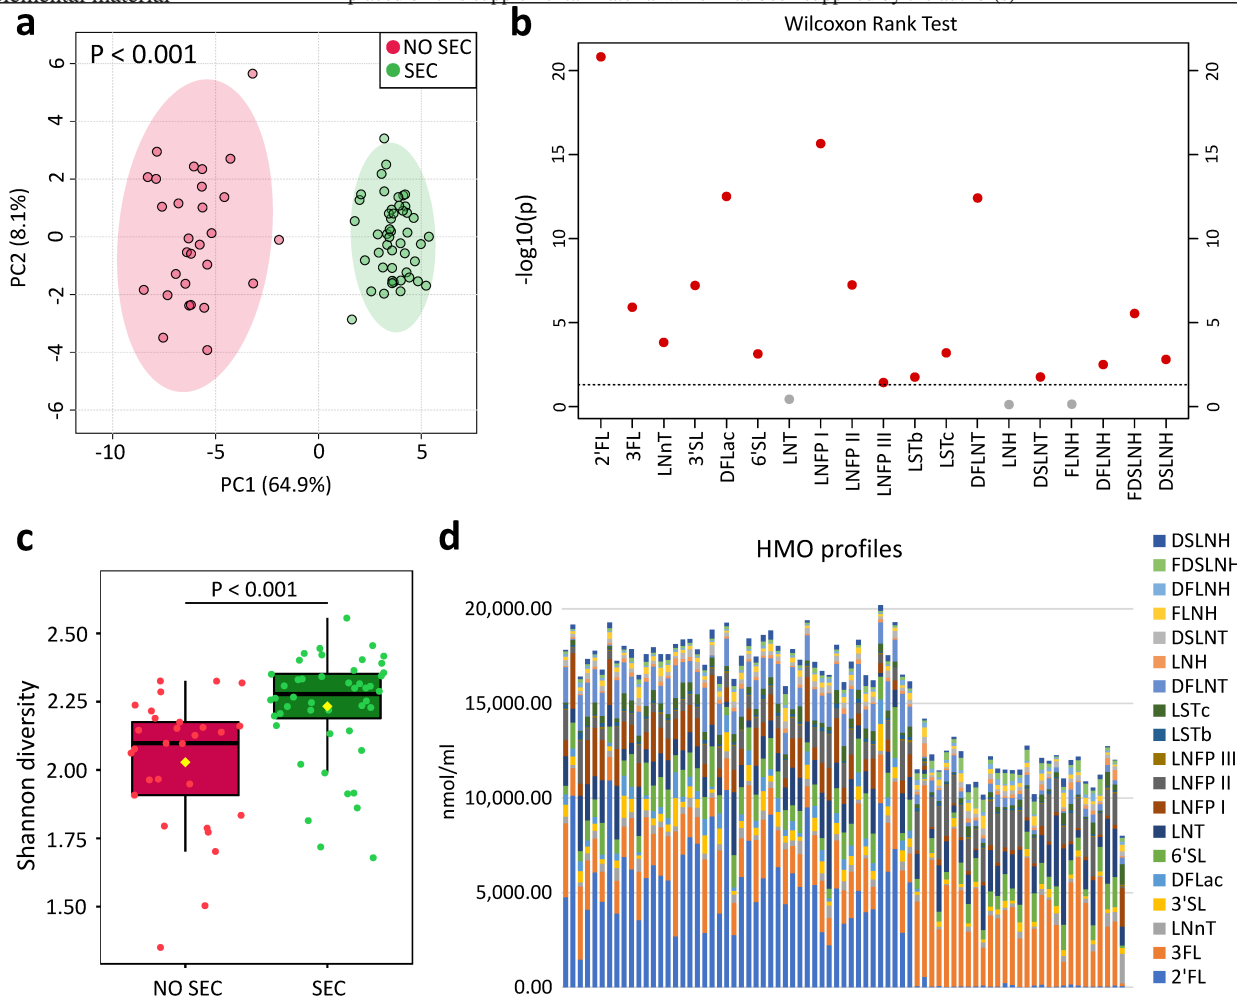

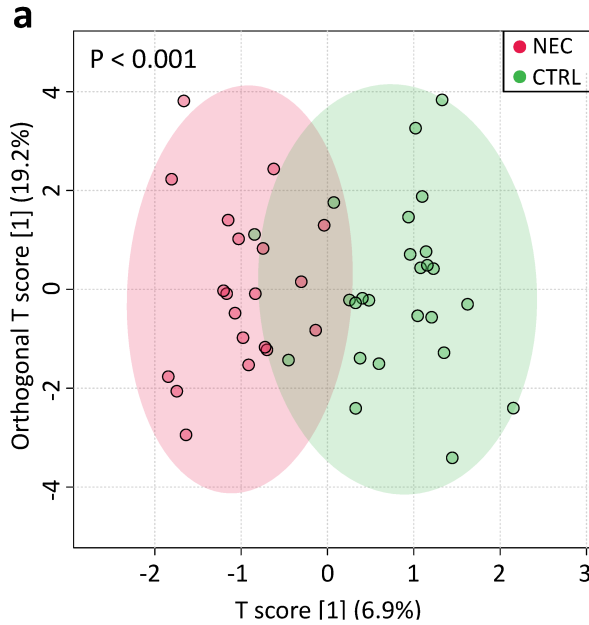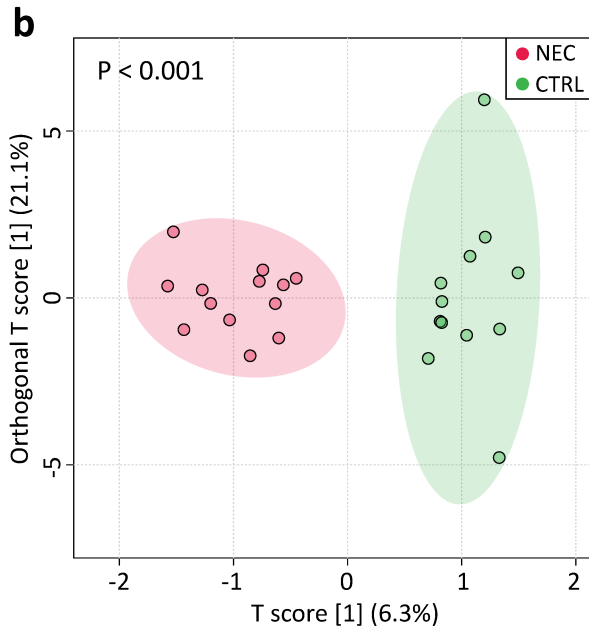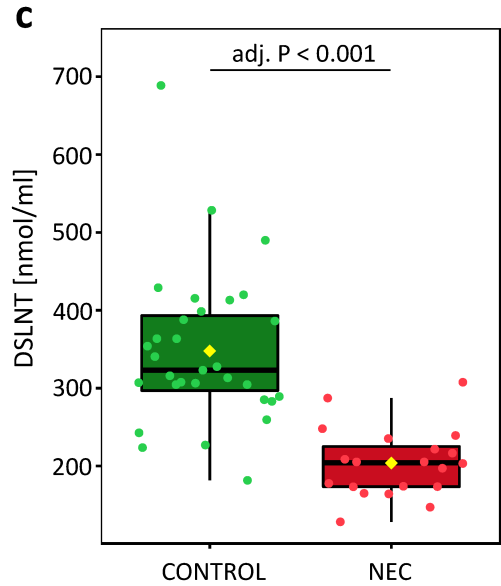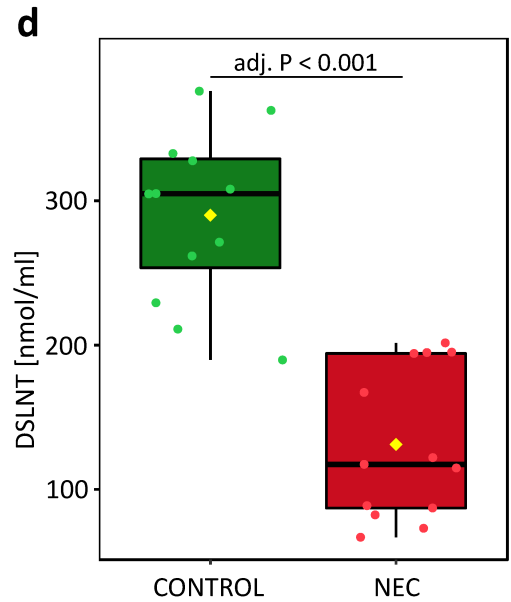

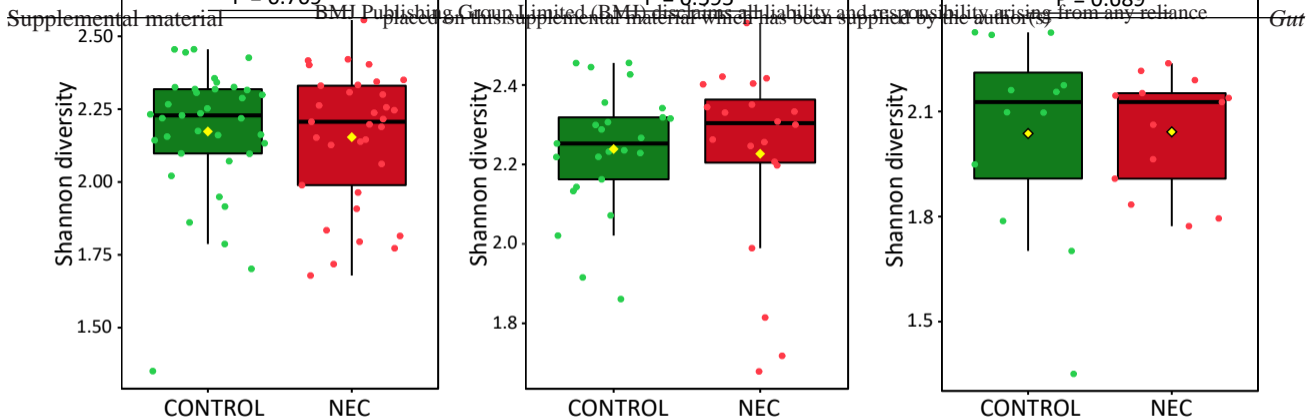

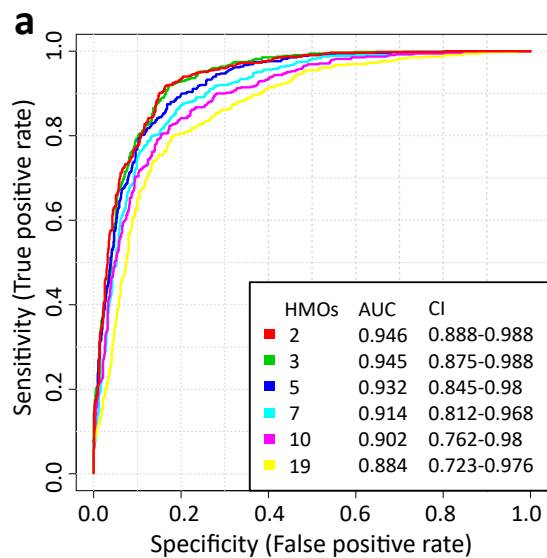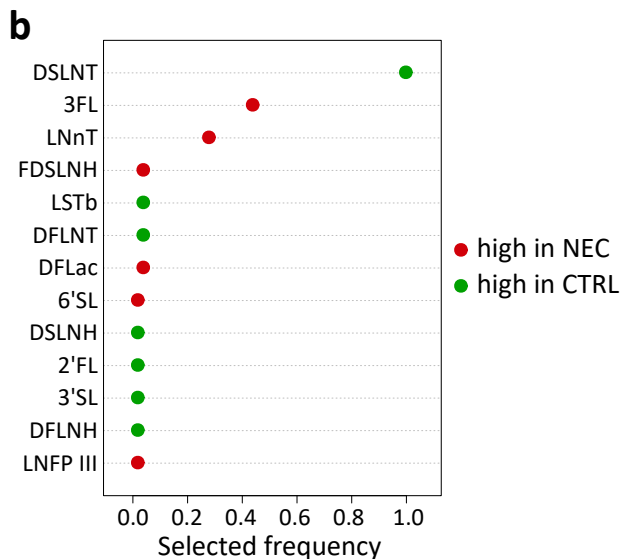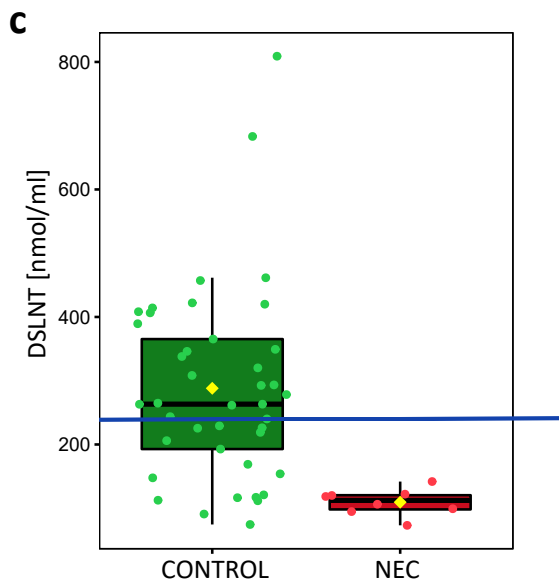

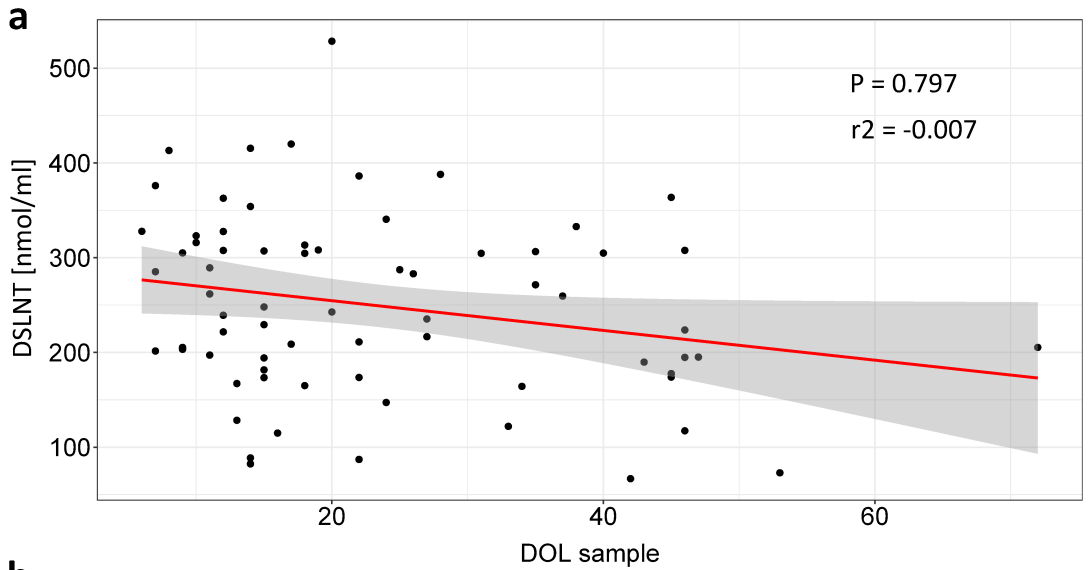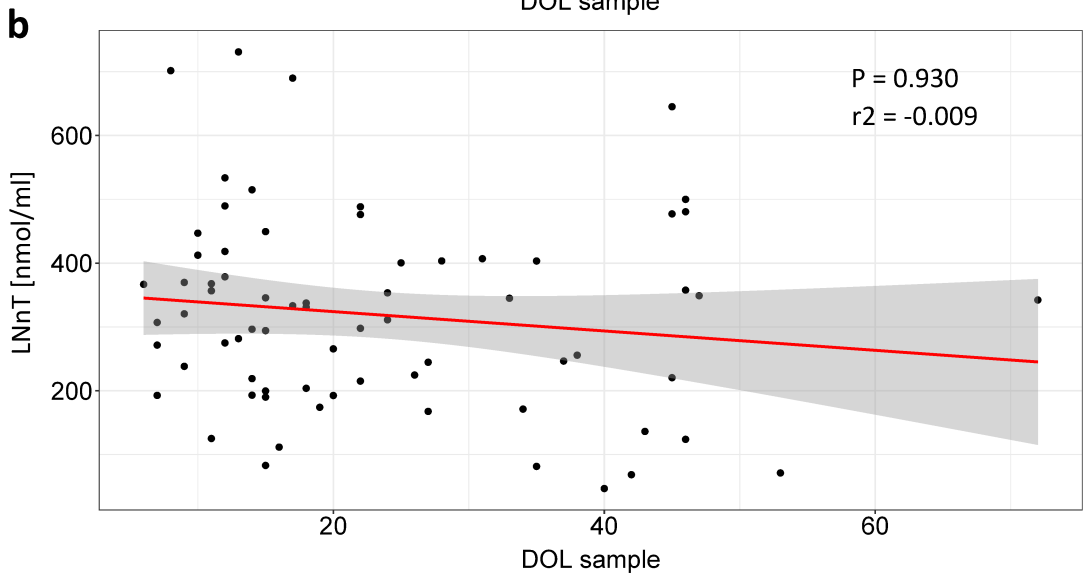

Supplement: NIHMS1811988-supplement-1.pdf [file NIHMS1811988-supplement-1.pdf]
